# Supplementary material for: LC-HR/MS Analysis of Lipophilic Extracts from Calendula arvensis (Vaill.) L. Organs: An Unexplored Source in Cosmeceuticals
Source: MDPI journal article supplement (doi:10.3390/molecules27248905), 2022-12-14
Supplement: s1 [file s1]

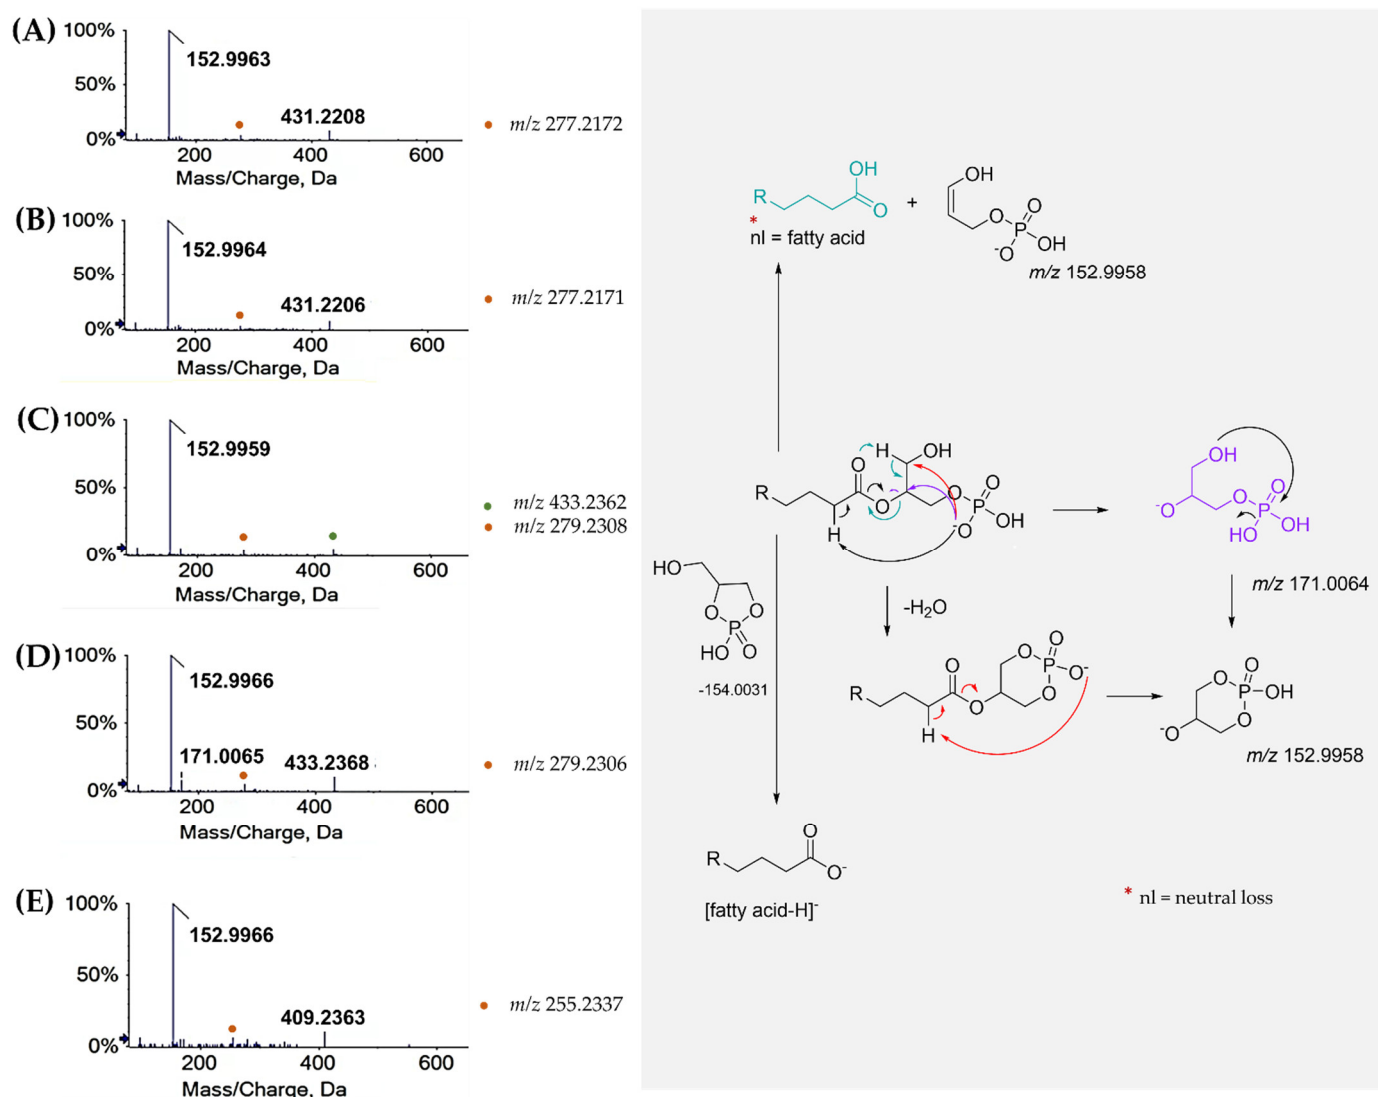

**Figure S1.** TOF-MS/MS spectrum of the compounds (A) **1**, (B) **4**, (C) **6**, (D) **8**, (E) **12** and proposed fragmentation pathway of monoacyl-PAs tentatively identified in *C. arvensis* organs' apolar extract (grey box).

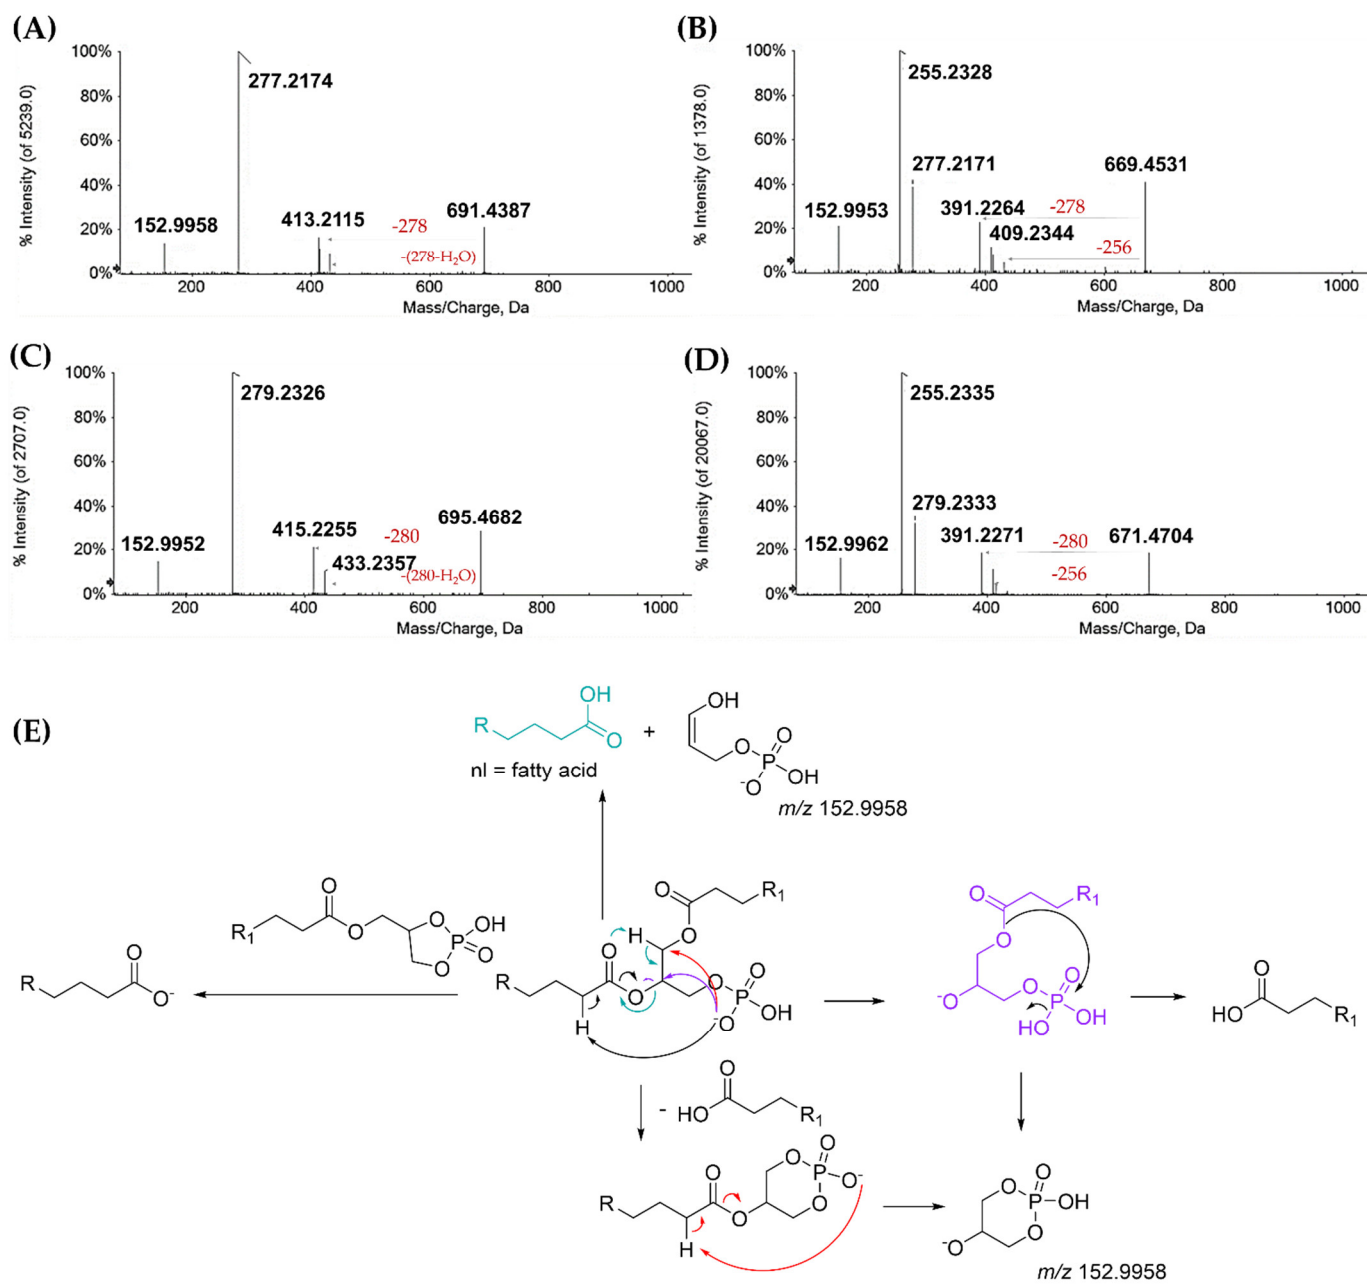

**Figure S2.** TOF-MS/MS spectrum of the compounds (A) 20, (B) 25, (C) 27, (D) 26, and (E) proposed fragmentation pathway of diacyl-PAs tentatively identified in *C. arvensis* organs' apolar extracts.

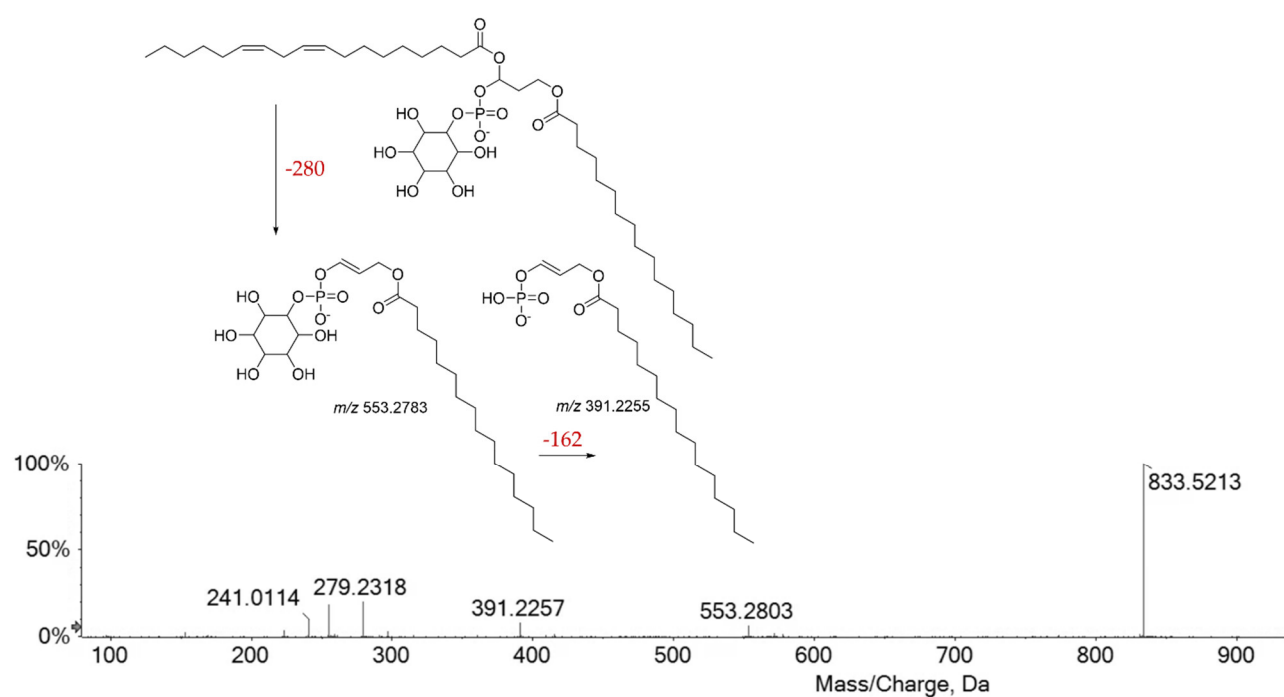

**Figure S3.** TOF-MS/MS spectrum of the theoretical  $[M-H]^-$  ion for compound 11.
